# Supplementary material for: Self-priming of Plk1 binding to BubR1 ensures accurate mitotic progression
Source: PubMed Central journal article supplement — Commun Biol. 2024 Nov 9;7:1473. doi: 10.1038/s42003-024-07205-2 (PMC11549336; doi:10.1038/s42003-024-07205-2), 2024-11-09
Supplement: 42003_2024_7205_MOESM3_ESM.pdf [file 42003_2024_7205_MOESM3_ESM.pdf]

## **Description Of Additional Supplementary File**

**File name:** Supplementary Data

**Description:** The source data behind the graphs in the paper
